# Supplementary material for: Real-time continuous glucose monitoring in preterm infants (REACT): an international, open-label, randomised controlled trial
Source: PubMed Central journal article supplement (PMC7970623; doi:10.1016/s2352-4642(20)30367-9), 2021-04
Supplement: mmc1.pdf [file mmc1.pdf]

# THE LANCET

## Child & Adolescent Health

### Supplementary appendix

This appendix formed part of the original submission and has been peer reviewed. We post it as supplied by the authors.

Supplement to: Beardsall K, Thomson L, Guy C, et al. Real-time continuous glucose monitoring in preterm infants (REACT): an international, open-label, randomised controlled trial. *Lancet Child Adolesc Health* 2021; published online Feb 9. [http://dx.doi.org/10.1016/S2352-4642\(20\)30367-9](http://dx.doi.org/10.1016/S2352-4642(20)30367-9).

## **Supplementary Data**

- 1. eFigure 1: Paper guideline**
- 2. eFigure 2: Histogram of the primary outcome by treatment group (n=179)**
- 3. eFigure 3: Staff questionnaire of acceptability**
- 4. eFigure 4: Parent questionnaire of acceptability.**
- 5. eFigure 5: Mean glycaemia and mean insulin infused by treatment arm**
  
- 6. eTable 1: Summary Data of Number of Subjects per centre**
- 7. eTable 2: Exploratory analyses of clinical outcomes**
- 8. eTable 3: Safety Analyses**
- 9. eTable 4: Sensitivity Analyses for Primary outcome**

| Sensor Glucose mmol/l                                                                                          | Falling                                                                                                                                                                                        | Stable                                                                                                                                                                                                    | Rising                                                                                                                                                                                                    |
|----------------------------------------------------------------------------------------------------------------|------------------------------------------------------------------------------------------------------------------------------------------------------------------------------------------------|-----------------------------------------------------------------------------------------------------------------------------------------------------------------------------------------------------------|-----------------------------------------------------------------------------------------------------------------------------------------------------------------------------------------------------------|
| <2.6                                                                                                           | <b>Check Blood Glucose</b><br>Stop any Insulin & Check all lines<br>Give additional Dextrose<br>Consider starting 20% Dextrose at 1ml/kg/hr                                                    | <b>Check Blood Glucose</b><br>Stop any Insulin & Check all lines<br>Give additional Dextrose<br>Consider starting 20% Dextrose at 1ml/kg/hr                                                               | <b>Check Blood Glucose</b><br>Review infusions & check lines<br>Ensure Insulin is not running<br>Consider starting/increasing 20% Dextrose at 1ml/kg/hr                                                   |
| 2.6-4.0                                                                                                        | <b>Check Blood Glucose</b><br>Stop any Insulin & Check all lines<br>Give additional Dextrose<br>Consider starting 20% Dextrose at 1ml/kg/hr                                                    | <b>Check Blood Glucose</b><br>Stop any Insulin & Check all lines<br>Give additional Dextrose<br>Consider starting 20% Dextrose at 1ml/kg/hr                                                               | <b>Observe the rate of rise</b><br>Review infusions & check lines<br>Ensure Insulin is not running<br>Consider need for additional Dextrose                                                               |
| <br>Target Range<br>4.0 - 8.0 | <b>IN TARGET</b><br>If the rate of fall means you will be <4.0mmol/l within 1 hour consider reducing Insulin                                                                                   | <b>IN TARGET</b>                                                                                                                                                                                          | <b>IN TARGET</b><br>Consider weaning any additional 20% Dextrose                                                                                                                                          |
| 8.0-10.0                                                                                                       | <b>Observe the rate of fall</b><br>Consider <b>reducing</b> Insulin infusion rate by 25%                                                                                                       | Stop any additional 20% Dextrose<br>or<br>Start Insulin at 0.05 units/kg/hr<br>or<br>if Insulin is already running <b>increase</b> Insulin infusion rate by 50%                                           | Stop any additional 20% Dextrose<br>or<br>Start Insulin at 0.05 units/kg/hr<br>or<br>if Insulin is already running <b>increase</b> Insulin infusion rate by 50%                                           |
| 10-15.0                                                                                                        | <b>Observe the rate of fall</b><br>Consider <b>increasing</b> Insulin infusion rate by 25%                                                                                                     | Stop any additional 20% Dextrose<br>or<br>Start Insulin at 0.05 units/kg/hr<br>or<br>if Insulin is already running <b>increase</b> Insulin infusion rate by 50%                                           | Stop any additional 20% Dextrose<br>or<br>Start Insulin at 0.05 units/kg/hr<br>or<br>if Insulin is already running <b>increase</b> Insulin infusion rate by 50%                                           |
| > 15                                                                                                           | <b>Observe the rate of fall</b><br>Consider <b>increasing</b> Insulin infusion rate by 50%                                                                                                     | Start Insulin at 0.05 units/kg/hr<br>or<br>consider <b>increasing</b> Insulin infusion rate by 100% (that is: Double)<br>Always check infusion lines if there is little or no response to an intervention | Start Insulin at 0.05 units/kg/hr<br>or<br>consider <b>increasing</b> Insulin infusion rate by 100% (that is: Double)<br>Always check infusion lines if there is little or no response to an intervention |
| CRITICAL                                                                                                       | Please remember continuous glucose sensor readings are provided to support clinical management.                                                                                                |                                                                                                                                                                                                           |                                                                                                                                                                                                           |
| CONCERN                                                                                                        | They provide additional information on trends in glucose levels which should be used to guide the need for blood glucose measurement. Capillary/venous blood glucose levels are more accurate. |                                                                                                                                                                                                           |                                                                                                                                                                                                           |
| IN TARGET                                                                                                      | Always check infusion lines if there is little or no response to an intervention                                                                                                               |                                                                                                                                                                                                           |                                                                                                                                                                                                           |

Figure 1 Paper Guideline

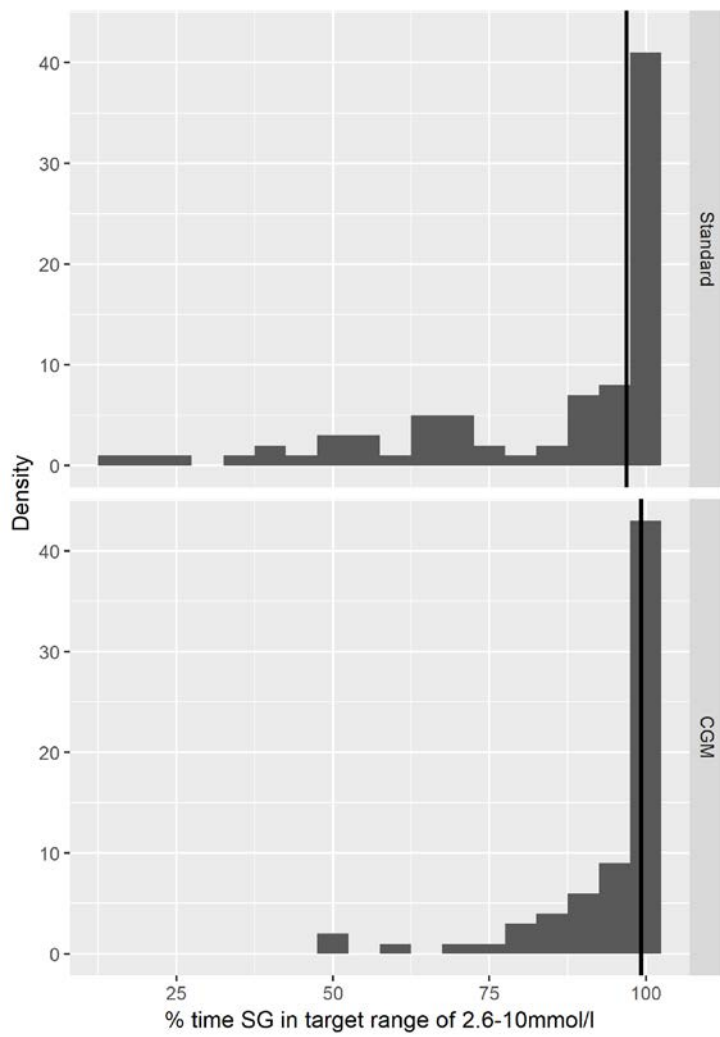

**Figure 2 Histogram of the primary outcome by treatment group (n=179)**

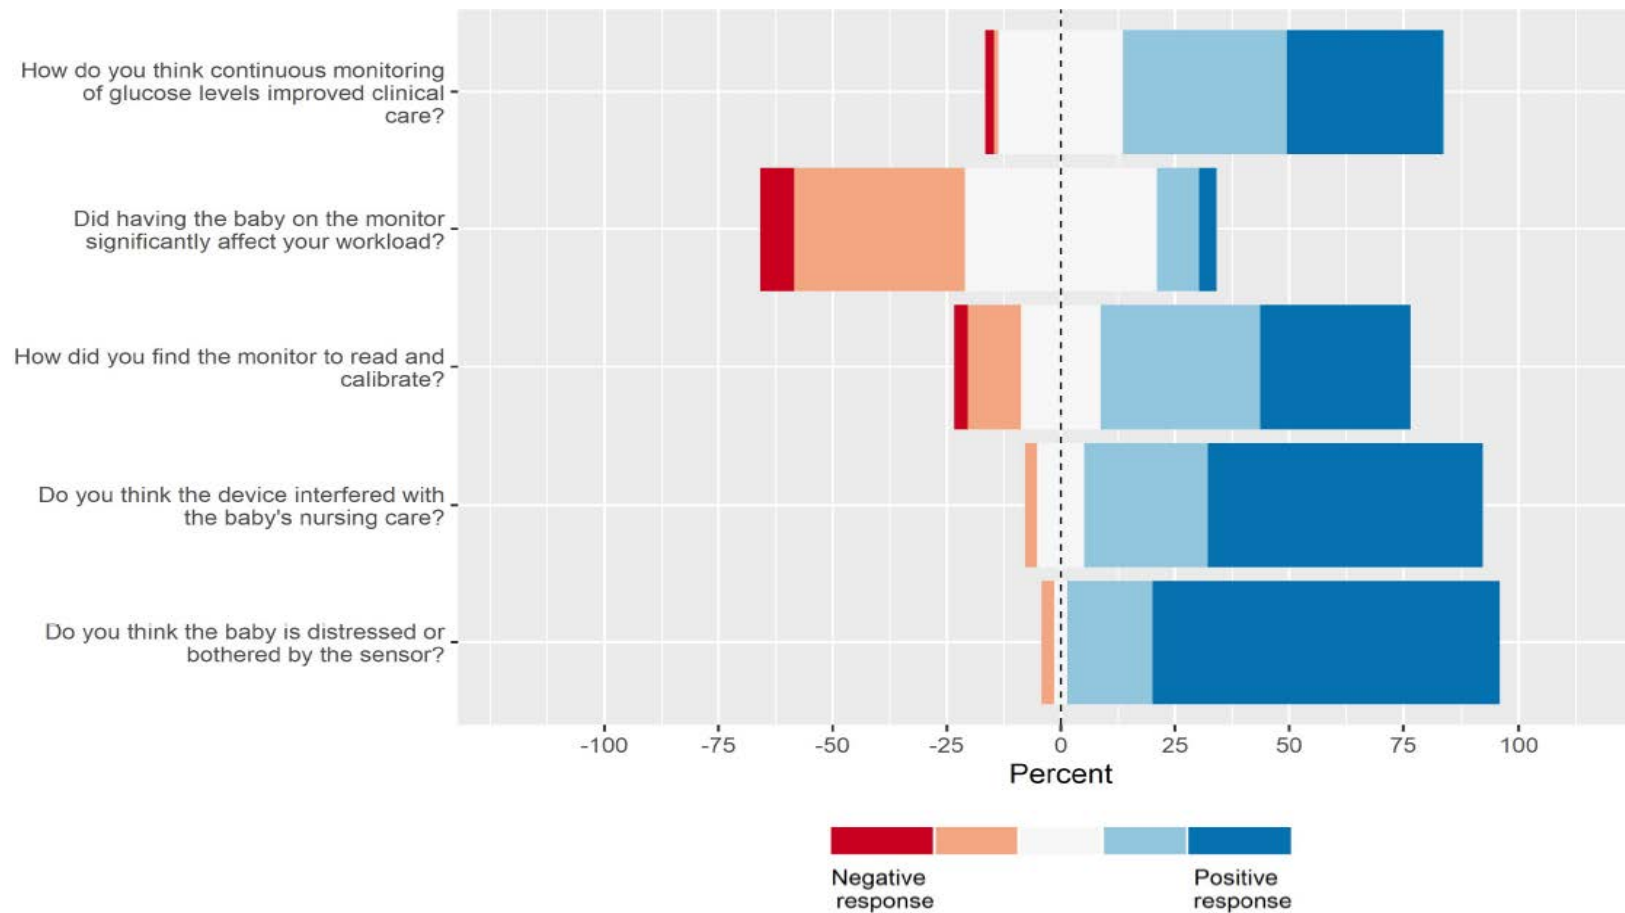

**Figure 3 Staff Questionnaire of acceptability.**

Stacked bar chart showing proportion of response for each Likert question Pooled data from day 3 and day 7 (n=54).

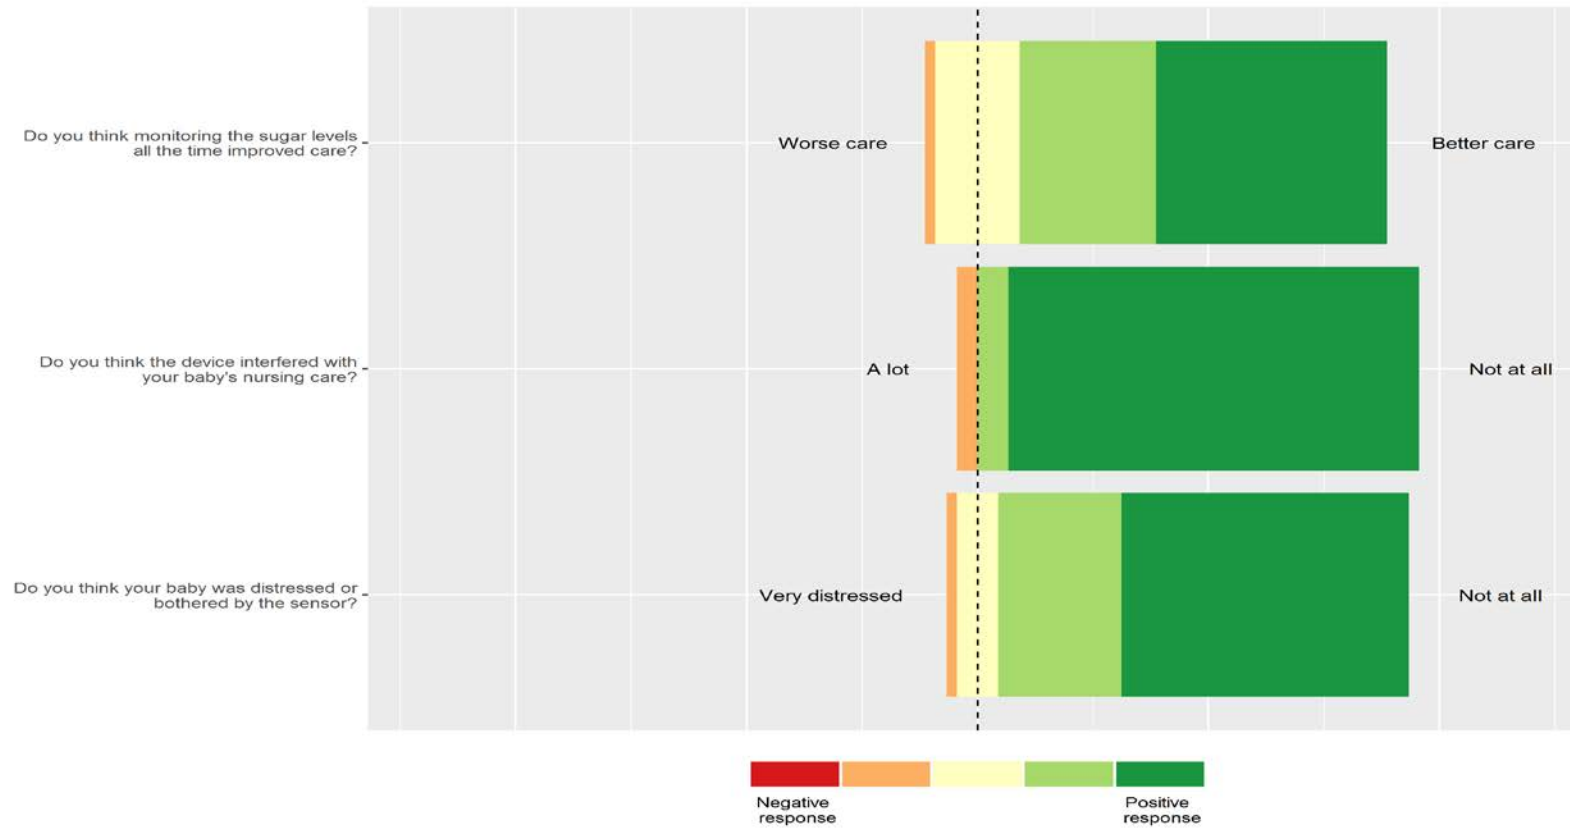

**Figure 4 Parent Questionnaire of acceptability.**

Stacked bar chart showing proportion of response for each Likert question (n=45)

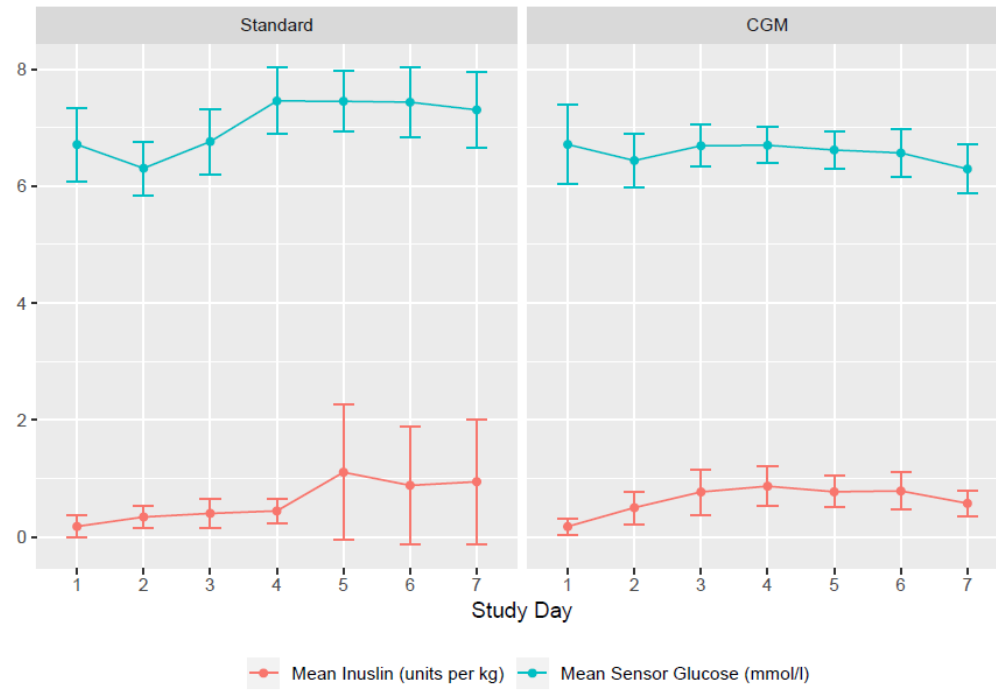

**Figure 5 Mean glycaemia and mean insulin infused by treatment arm**

CGM: Continuous glucose monitoring intervention

|                      | <b>mean</b> | <b>sd</b> | <b>median</b> | <b>Min</b> | <b>maz</b> |
|----------------------|-------------|-----------|---------------|------------|------------|
| <b>Standard Care</b> | <b>7.31</b> | <b>5</b>  | <b>7.19</b>   | <b>2</b>   | <b>28</b>  |
| <b>Real Time CGM</b> | <b>6.46</b> | <b>3</b>  | <b>7.62</b>   | <b>1</b>   | <b>28</b>  |

Sites were adjusted for using a fixed effects model in the primary analysis. This was borderline case as to whether fixed- or random-effects for site were more appropriate. We report based on the pre-specified choice. Sensitivity analysis show the treatment effect is consistent with either modelling assumption: 9.26 (2.79) [estimate (SE)] in the random effects model

**eTable 1. Summary Data of Number of Subjects per Centre**



| Outcome                                 | Standard     | CGM          | Adjusted Estimate <sup>a</sup><br>(95% CI) | P-value |
|-----------------------------------------|--------------|--------------|--------------------------------------------|---------|
| Mortality                               | 6% (6/95)    | 2% (2/84)    | 0.263 [0.0353, 1.3]                        | 0.13    |
| Infection                               | 62% (53/85)  | 58% (50/74)  | 1 [0.46, 2.2]                              | 0.99    |
| NEC                                     | 28% (24/85)  | 13% (10/75)  | 0.328 [0.129, 0.78]                        | 0.014   |
| PDA                                     | 31% (26/85)  | 26% (19/74)  | 0.52 [0.199, 1.3]                          | 0.16    |
| Intracerebral pathology                 | 32% (27/84)  | 33% (25/75)  | 1.02 [0.51, 2.1]                           | 0.95    |
| BPD                                     | 66% (56/85)  | 60% (45/75)  | 1.2 [0.52, 2.8]                            | 0.66    |
| Maximum ROP                             | 1.5 (3.6)    | 1.1 (3.8)    | -0.26 (-1.37, 0.85)                        | 0.64    |
| Weight SDS – day 7                      | -1.3 (0.75)  | -1.26 (0.79) | 0.05 (-0.19, 0.28)                         | 0.69    |
| Weight SDS – 36 weeks gestation         | -1.54 (0.94) | -1.56 (0.93) | -0.04 (-0.34, 0.25)                        | 0.78    |
| Body length SDS – day 7                 | -1.81 (1.07) | -1.78 (0.87) | -0.02 (-0.36, 0.31)                        | 0.89    |
| Body length SDS – 36 weeks gestation    | -2.6 (1.6)   | -2.9 (1.8)   | -0.38 (-1.19, 0.42)                        | 0.34    |
| Head circumference – day 7              | -1.84 (0.77) | -1.76 (0.83) | 0.07 (-0.2, 0.35)                          | 0.60    |
| Head circumference – 36 weeks gestation | -1.3 (1.6)   | -1.1 (1.7)   | 0.13 (-0.44, 0.7)                          | 0.65    |
| Total insulin – week 2 (units per kg)   | 1.1 (2.6)    | 1.1 (3.0)    | 0.1 (-0.76, 0.96)                          | 0.82    |

Data presented as mean (SD) or percentage (frequency). <sup>a</sup>Adjusted for gestation and centre: data presented as mean difference (95% CI) and odds ratio [95% CI]. NEC: necrotizing enterocolitis; PDA: patent ductus arteriosus; BPD: bronchopulmonary dysplasia; ROP: retinopathy of prematurity; SDS: standard deviation score

## eTable 2 Clinical Outcomes Exploratory Analyses

| Variable                                       | Statistics | Standard      | CGM           | Logistic regression                          |         |
|------------------------------------------------|------------|---------------|---------------|----------------------------------------------|---------|
|                                                |            |               |               | Adjusted Odds Ratio <sup>a</sup><br>(95% CI) | P-value |
| 2.2mmol/l < BG < 2.6mmol/l                     | Yes        | 11.8% (11/93) | 14.7% (11/75) | 1.2 (0.48, 3.2)                              | 0.7     |
| BG ≤ 2.2mmol/l                                 | Yes        | 6.5% (6/93)   | 13.3% (10/75) | 2.2 (0.7, 7.1)                               | 0.2     |
| Continuous episode of SG < 2.6mmol/l for >1 hr | Yes        | 15.3% (13/85) | 5.7% (4/70)   | 0.361 (0.0919, 1.2)                          | 0.1     |
| Length of time SG < 2.6mmol/l (hours)          | n          | 85            | 70            |                                              |         |
|                                                | Mean (SD)  | 1.0 (3.2)     | 0.5 (1.7)     |                                              |         |
|                                                | Median     | 0             | 0             |                                              |         |
|                                                | Min, Max   | 0, 22         | 0, 11.2       |                                              |         |
| % time SG < 2.6mmol/l                          | n          | 85            | 70            |                                              |         |
|                                                | Mean (SD)  | 1.1 (3.2)     | 1 (5.3)       |                                              |         |
|                                                | Median     | 0             | 0             |                                              |         |
|                                                | Min, Max   | 0, 16.7       | 0, 41         |                                              |         |

<sup>a</sup>Adjusted for centre and gestation (<26 weeks, ≥26 weeks)

**eTable 3 Safety analyses of real time continuous glucose monitoring versus standard care**

Title: Primary outcome  
 Population: Full Analysis (N = 179)  
 Subtitle: Model fitting results - sensitivity analyses

| Model                                                     | Outcome                                    | Covariate                              | Estimate<br>(Std. Error) | 95% CI             | P-value           |
|-----------------------------------------------------------|--------------------------------------------|----------------------------------------|--------------------------|--------------------|-------------------|
| LM weighted by<br>number of SG<br>observations            | % time SG in<br>target of 2.6-<br>10mmol/l | (Intercept)                            | 80 (3.39)                | (73.3,<br>86.7)    | <0.001            |
|                                                           |                                            | CGM versus standard                    | 8.5 (2.58)               | (3.4,<br>13.6)     | 0.001             |
|                                                           |                                            | N36 (ref: N01)                         | -4.57 (15.1)             | (-34.4,<br>25.3)   | 0.763             |
|                                                           |                                            | N42                                    | 7.04 (5.5)               | (-3.85,<br>17.9)   | 0.203             |
|                                                           |                                            | N43                                    | -0.0351<br>(3.82)        | (-7.59,<br>7.52)   | 0.993             |
|                                                           |                                            | N68                                    | 1.73 (3.95)              | (-6.09,<br>9.54)   | 0.663             |
|                                                           |                                            | N73                                    | 3.55 (5.39)              | (-7.1,<br>14.2)    | 0.511             |
|                                                           |                                            | N74                                    | 10 (12.4)                | (-14.6,<br>34.6)   | 0.422             |
|                                                           |                                            | N85                                    | 8.28 (6.43)              | (-4.42,<br>21)     | 0.2               |
|                                                           |                                            | N86                                    | -21 (8.66)               | (-38.1,<br>3.89)   | 0.017             |
|                                                           |                                            | N87                                    | -16.5 (12)               | (-40.3,<br>7.31)   | 0.173             |
|                                                           |                                            | N88                                    | -26.5 (7.21)             | (-40.8,<br>12.2)   | <0.001            |
|                                                           |                                            | ND3                                    | 6.33 (6.22)              | (-5.96,<br>18.6)   | 0.311             |
|                                                           |                                            | SP3                                    | 9.19 (7.64)              | (-5.91,<br>24.3)   | 0.231             |
|                                                           |                                            |                                        | Gestation >= 26 weeks    | 6.07 (3.29)        | (-0.431,<br>12.6) |
| RSD = 15.8                                                |                                            |                                        |                          |                    |                   |
| LM adjusted for start<br>time<br>of first SG and first SG | % time SG in<br>target of 2.6-<br>10mmol/l | (Intercept)                            | 82.8 (4.66)              | (73.6,<br>92)      | <0.001            |
|                                                           |                                            | CGM versus standard                    | 9.09 (2.64)              | (3.86,<br>14.3)    | <0.001            |
|                                                           |                                            | Time from birth (hours)<br>to first SG | 0.0353<br>(0.132)        | (-0.226,<br>0.297) | 0.79              |
|                                                           |                                            | First SG measurement<br>(mmol/l)       | -2.3 (0.553)             | (-3.4,<br>1.21)    | <0.001            |
|                                                           |                                            | N36 (ref: N01)                         | -12.8 (12.3)             | (-37.1,<br>11.6)   | 0.302             |
|                                                           |                                            | N42                                    | 2.77 (6.01)              | (-9.11,<br>14.6)   | 0.645             |
|                                                           |                                            | N43                                    | 0.00483<br>(4.03)        | (-7.97,<br>7.98)   | 0.999             |
|                                                           |                                            | N68                                    | -2.76 (4.17)             | (-11,<br>5.49)     | 0.51              |
|                                                           |                                            | N73                                    | -0.444<br>(5.29)         | (-10.9,<br>10)     | 0.933             |

| Model                                                      | Outcome                             | Covariate                                             | Estimate<br>(Std. Error) | 95% CI          | P-<br>value |
|------------------------------------------------------------|-------------------------------------|-------------------------------------------------------|--------------------------|-----------------|-------------|
|                                                            |                                     | N74                                                   | 3.84 (12.2)              | (-20.2, 27.9)   | 0.753       |
|                                                            |                                     | N85                                                   | 4.94 (6.61)              | (-8.13, 18)     | 0.456       |
|                                                            |                                     | N86                                                   | -14.6 (8.54)             | (-31.4, 2.31)   | 0.09        |
|                                                            |                                     | N87                                                   | -16.4 (11.9)             | (-39.9, 7.16)   | 0.171       |
|                                                            |                                     | N88                                                   | -26.9 (7.74)             | (-42.2, -11.6)  | <0.001      |
|                                                            |                                     | ND3                                                   | 2.7 (6.72)               | (-10.6, 16)     | 0.688       |
|                                                            |                                     | SP3                                                   | 7.13 (8.46)              | (-9.59, 23.9)   | 0.401       |
|                                                            |                                     | Gestation >= 26 weeks                                 | 1.25 (3.51)              | (-5.68, 8.18)   | 0.721       |
|                                                            | RSD = 16.14                         |                                                       |                          |                 |             |
| LM with interaction between time to first SG and treatment | % time SG in target of 2.6-10mmol/l | (Intercept)                                           | 82.6 (5.71)              | (71.3, 93.9)    | <0.001      |
|                                                            |                                     | CGM versus standard                                   | 9.47 (6.83)              | (-4.04, 23)     | 0.168       |
|                                                            |                                     | Time from birth (hours) to first SG                   | 0.043 (0.183)            | (-0.319, 0.405) | 0.815       |
|                                                            |                                     | First SG measurement (mmol/l)                         | -2.3 (0.555)             | (-3.4, -1.2)    | <0.001      |
|                                                            |                                     | N36 (ref: N01)                                        | -12.8 (12.4)             | (-37.4, 11.7)   | 0.303       |
|                                                            |                                     | N42                                                   | 2.71 (6.1)               | (-9.35, 14.8)   | 0.657       |
|                                                            |                                     | N43                                                   | -0.00716 (4.05)          | (-8.02, 8.01)   | 0.999       |
|                                                            |                                     | N68                                                   | -2.76 (4.19)             | (-11, 5.52)     | 0.51        |
|                                                            |                                     | N73                                                   | -0.467 (5.32)            | (-11, 10.1)     | 0.93        |
|                                                            |                                     | N74                                                   | 3.96 (12.4)              | (-20.5, 28.5)   | 0.749       |
|                                                            |                                     | N85                                                   | 4.93 (6.63)              | (-8.18, 18)     | 0.458       |
|                                                            |                                     | N86                                                   | -14.6 (8.62)             | (-31.7, 2.42)   | 0.092       |
|                                                            |                                     | N87                                                   | -16.5 (12)               | (-40.3, 7.33)   | 0.173       |
|                                                            |                                     | N88                                                   | -27 (7.97)               | (-42.7, -11.2)  | <0.001      |
|                                                            |                                     | ND3                                                   | 2.7 (6.75)               | (-10.6, 16)     | 0.689       |
|                                                            |                                     | SP3                                                   | 7.11 (8.49)              | (-9.68, 23.9)   | 0.404       |
|                                                            |                                     | Gestation >= 26 weeks                                 | 1.26 (3.52)              | (-5.7, 8.23)    | 0.72        |
|                                                            |                                     | [CGM - treatment:Time from birth (hours) to first SG] | -0.0147 (0.242)          | (-0.494, 0.465) | 0.952       |
|                                                            | RSD = 16.2                          |                                                       |                          |                 |             |

| Model                                                    | Outcome                                    | Covariate                                                                    | Estimate<br>(Std. Error)                   | 95% CI             | P-<br>value |                 |        |
|----------------------------------------------------------|--------------------------------------------|------------------------------------------------------------------------------|--------------------------------------------|--------------------|-------------|-----------------|--------|
| LM with interaction<br>between<br>first SG and treatment | % time SG in<br>target of 2.6-<br>10mmol/l | (Intercept)                                                                  | 80 (4.63)                                  | (70.8,<br>89.1)    | <0.001      |                 |        |
|                                                          |                                            | CGM versus standard                                                          | 10.3 (2.61)                                | (5.17,<br>15.5)    | <0.001      |                 |        |
|                                                          |                                            | First SG measurement<br>(mmol/l)                                             | -3.49<br>(0.673)                           | (-4.82, -<br>2.16) | <0.001      |                 |        |
|                                                          |                                            | Time from birth (hours)<br>to first SG                                       | 0.0591<br>(0.129)                          | (-0.196,<br>0.314) | 0.648       |                 |        |
|                                                          |                                            | N36 (ref: N01)                                                               | -11.6 (12)                                 | (-35.3,<br>12.2)   | 0.337       |                 |        |
|                                                          |                                            | N42                                                                          | 1.84 (5.86)                                | (-9.75,<br>13.4)   | 0.754       |                 |        |
|                                                          |                                            | N43                                                                          | 0.839 (3.94)                               | (-6.95,<br>8.63)   | 0.831       |                 |        |
|                                                          |                                            | N68                                                                          | -2.56 (4.06)                               | (-10.6,<br>5.47)   | 0.53        |                 |        |
|                                                          |                                            | N73                                                                          | -0.185<br>(5.15)                           | (-10.4,<br>10)     | 0.971       |                 |        |
|                                                          |                                            | N74                                                                          | 2.68 (11.9)                                | (-20.8,<br>26.1)   | 0.822       |                 |        |
|                                                          |                                            | N85                                                                          | 4.75 (6.43)                                | (-7.97,<br>17.5)   | 0.461       |                 |        |
|                                                          |                                            | N86                                                                          | -19.1 (8.46)                               | (-35.9, -<br>2.42) | 0.025       |                 |        |
|                                                          |                                            | N87                                                                          | -16.8 (11.6)                               | (-39.7,<br>6.12)   | 0.149       |                 |        |
|                                                          |                                            | N88                                                                          | -27.1 (7.54)                               | (-42, -<br>12.2)   | <0.001      |                 |        |
|                                                          |                                            | ND3                                                                          | 3.11 (6.54)                                | (-9.83,<br>16.1)   | 0.635       |                 |        |
|                                                          |                                            | SP3                                                                          | 5.63 (8.25)                                | (-10.7,<br>21.9)   | 0.496       |                 |        |
|                                                          |                                            | Gestation >= 26 weeks                                                        | 3.38 (3.49)                                | (-3.52,<br>10.3)   | 0.334       |                 |        |
|                                                          |                                            | [CGM - treatment:First<br>SG measurement<br>(mmol/l)]                        | 3.07 (1.04)                                | (1, 5.13)          | 0.004       |                 |        |
|                                                          |                                            | RSD = 15.71                                                                  |                                            |                    |             |                 |        |
|                                                          |                                            | GLS allowing for<br>heteroscedastic<br>variances between<br>treatment groups | % time SG in<br>target of 2.6-<br>10mmol/l | (Intercept)        | 81.9 (3.44) | (75.2,<br>88.7) | <0.001 |
| CGM versus standard                                      | 8.92 (2.7)                                 |                                                                              |                                            | (3.63,<br>14.2)    | 0.001       |                 |        |
| N36 (ref: N01)                                           | 2.88 (9.38)                                |                                                                              |                                            | (-15.5,<br>21.3)   | 0.759       |                 |        |
| N42                                                      | 8.28 (5.15)                                |                                                                              |                                            | (-1.82,<br>18.4)   | 0.11        |                 |        |
| N43                                                      | 3.87 (3.3)                                 |                                                                              |                                            | (-2.59,<br>10.3)   | 0.242       |                 |        |
| N68                                                      | -0.0845<br>(3.22)                          |                                                                              |                                            | (-6.4,<br>6.23)    | 0.979       |                 |        |
| N73                                                      | 4.67 (4.24)                                |                                                                              |                                            | (-3.63,<br>13)     | 0.272       |                 |        |

| Model                           | Outcome                             | Covariate             | Estimate<br>(Std. Error) | 95% CI       | P-value        |        |
|---------------------------------|-------------------------------------|-----------------------|--------------------------|--------------|----------------|--------|
|                                 |                                     |                       | N74                      | 9.2 (9.38)   | (-9.18, 27.6)  | 0.328  |
|                                 |                                     |                       | N85                      | 8.46 (5.5)   | (-2.33, 19.2)  | 0.126  |
|                                 |                                     |                       | N86                      | -23.2 (8.15) | (-39.2, -7.26) | 0.005  |
|                                 |                                     |                       | N87                      | -11.8 (15.7) | (-42.5, 18.9)  | 0.453  |
|                                 |                                     |                       | N88                      | -12.2 (6.5)  | (-25, 0.523)   | 0.062  |
|                                 |                                     |                       | ND3                      | 7.3 (5.5)    | (-3.48, 18.1)  | 0.187  |
|                                 |                                     |                       | SP3                      | 9.02 (6.79)  | (-4.28, 22.3)  | 0.186  |
|                                 |                                     | Gestation >= 26 weeks |                          | 1.53 (2.93)  | (-4.21, 7.27)  | 0.603  |
|                                 | RSD = 9.59                          |                       |                          |              |                |        |
| Random intercept for site       | % time SG in target of 2.6-10mmol/l | (Intercept)           |                          | 79.5 (4.14)  | (71.3, 87.7)   | <0.001 |
|                                 |                                     | CGM versus standard   |                          | 9.26 (2.79)  | (3.75, 14.8)   | 0.001  |
|                                 |                                     | Gestation >= 26 weeks |                          | 5.19 (3.56)  | (-1.84, 12.2)  | 0.146  |
|                                 | RSD = 17.15                         |                       |                          |              |                |        |
| LM adjusting for gestation only | % time SG in target of 2.6-10mmol/l | (Intercept)           |                          | 80.1 (3.45)  | (73.3, 86.9)   | <0.001 |
|                                 |                                     | CGM versus standard   |                          | 9.38 (2.88)  | (3.7, 15.1)    | 0.001  |
|                                 |                                     | Gestation >= 26 weeks |                          | 5.28 (3.62)  | (-1.87, 12.4)  | 0.147  |
|                                 | RSD = 17.8                          |                       |                          |              |                |        |

RSD = residual error standard deviation; LM = linear regression model; GLS = generalised least squares

**eTable 4: Sensitivity Analyses for Primary outcome**
